# Supplementary figures and images for: ONO‐7684 a novel oral FXIa inhibitor: Safety, tolerability, pharmacokinetics and pharmacodynamics in a first‐in‐human study
Source: PubMed Central journal article supplement — Br J Clin Pharmacol. 2021 Jan 23;87(8):3177–89. doi: 10.1111/bcp.14732 (PMC8359378; doi:10.1111/bcp.14732), 2021-01-23

Supplementary Figure 5

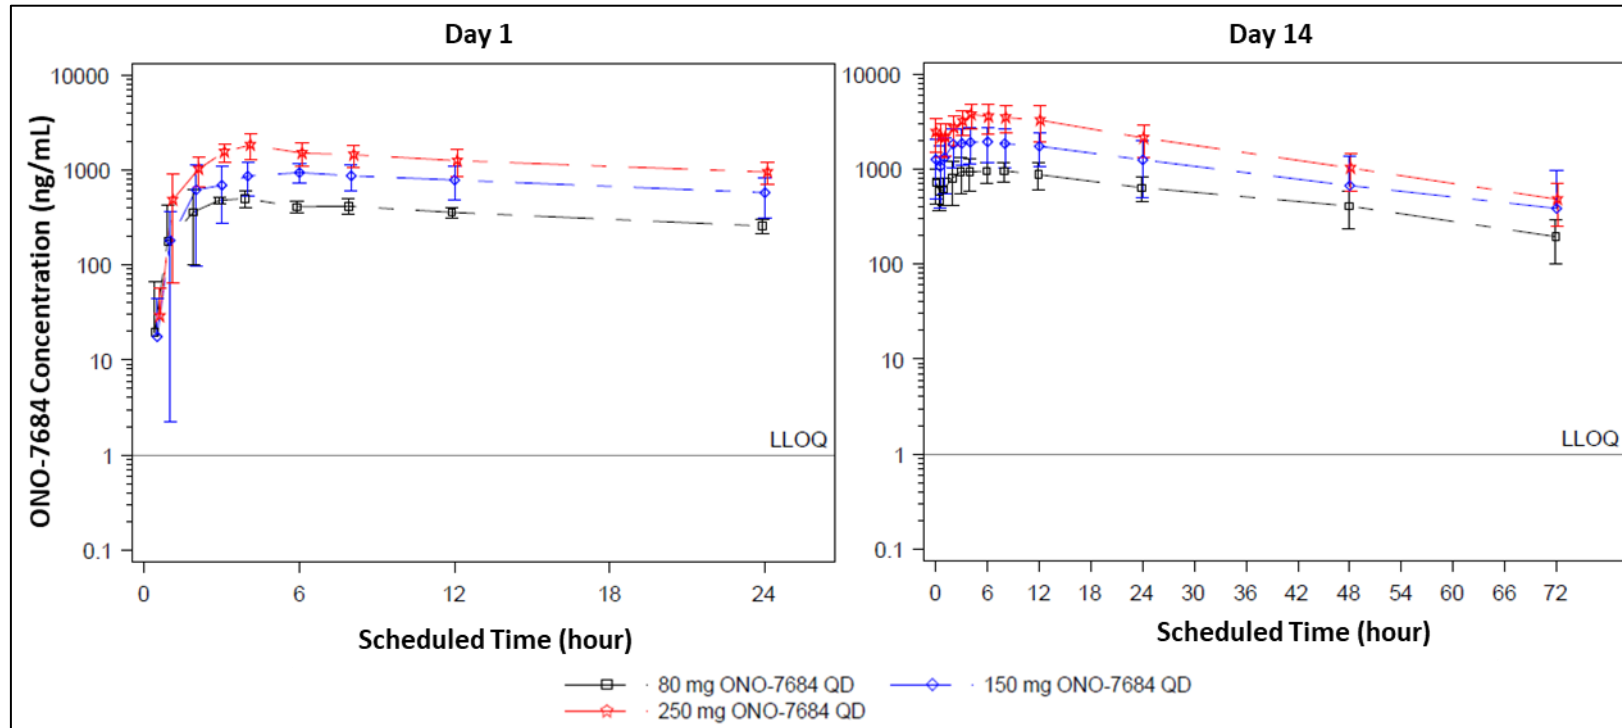

Supplement: BCP-87-3177-s002.pdf [file BCP-87-3177-s002.pdf]

# Supplementary Figure 1 - Coagulation cascade

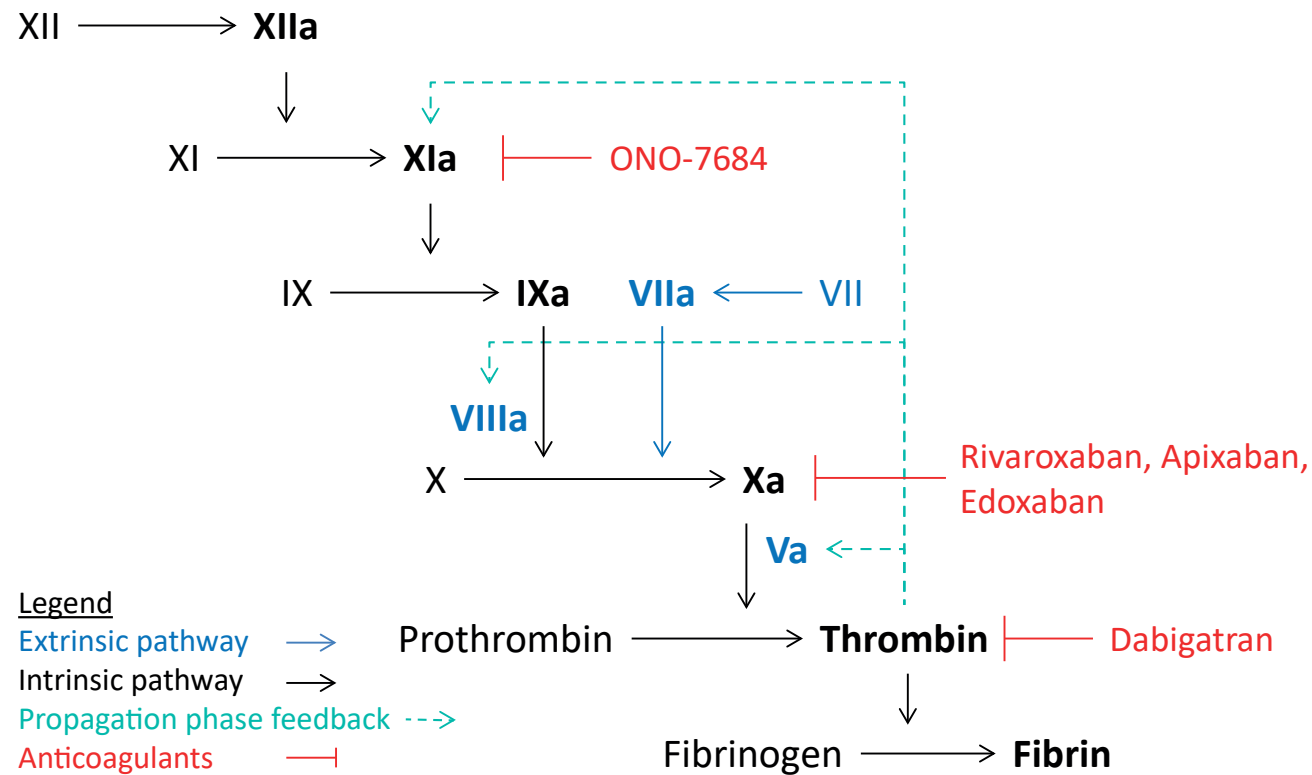

Supplement: BCP-87-3177-s003.pdf [file BCP-87-3177-s003.pdf]

Supplementary Figure 4

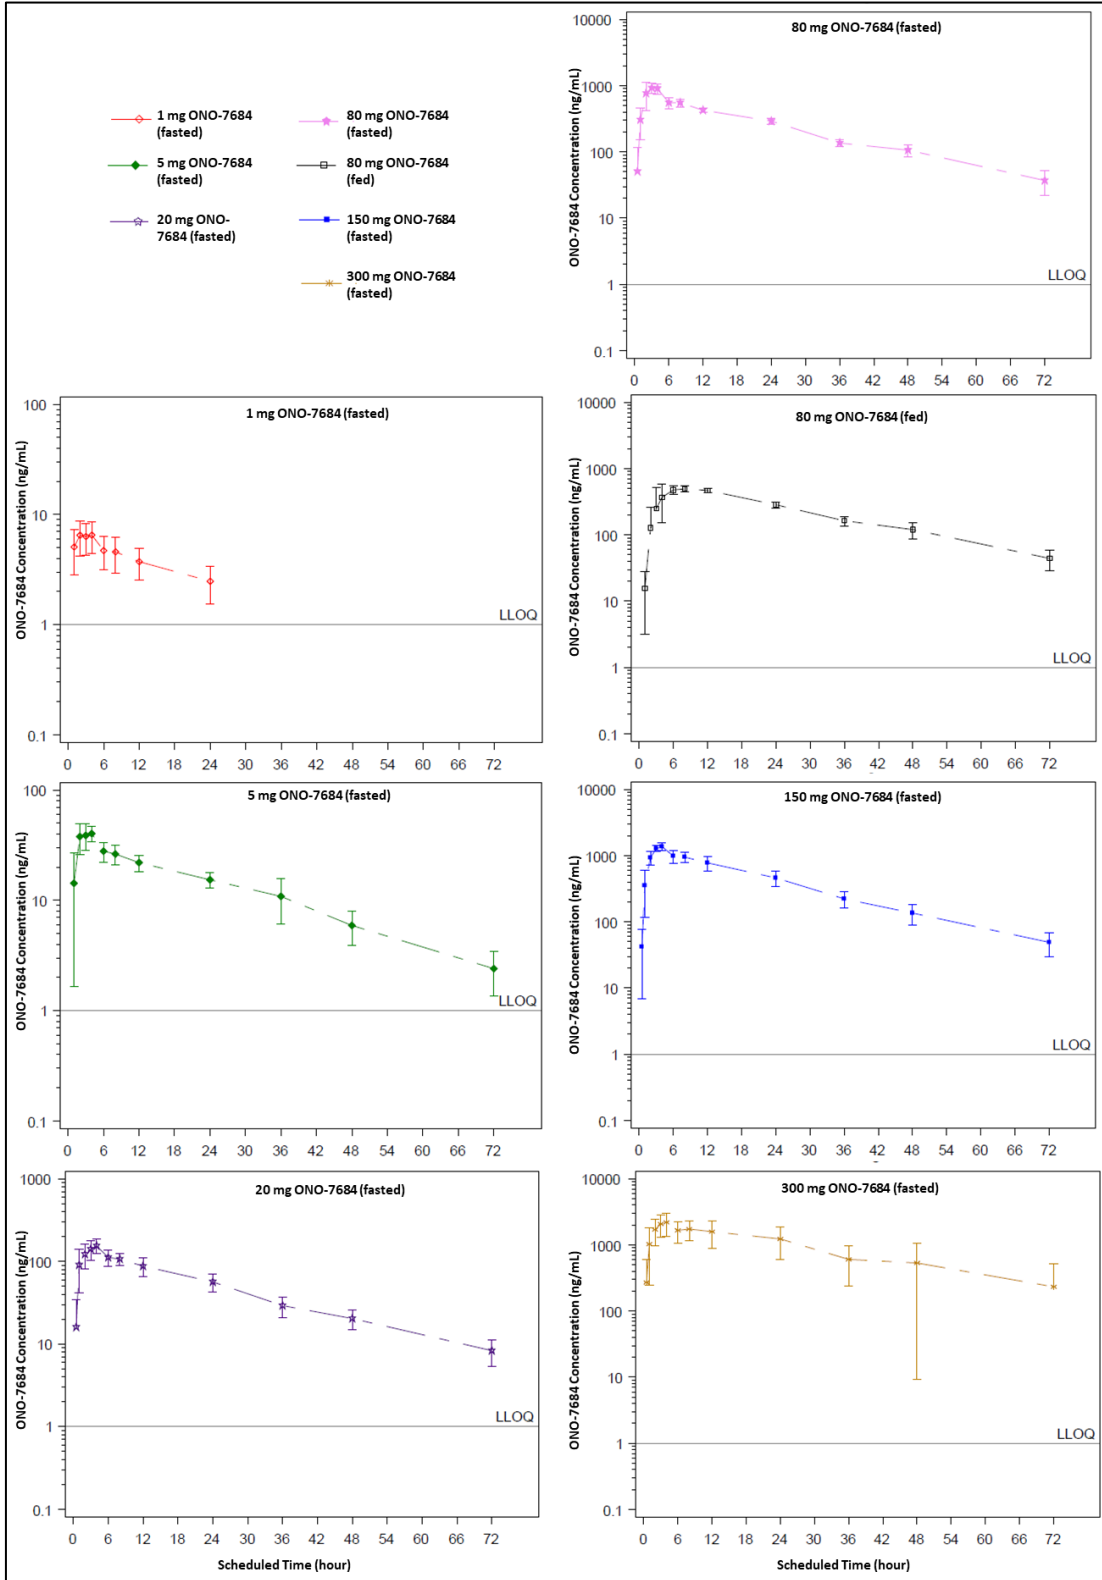

Supplement: BCP-87-3177-s006.pdf [file BCP-87-3177-s006.pdf]

Supplementary Figure 8

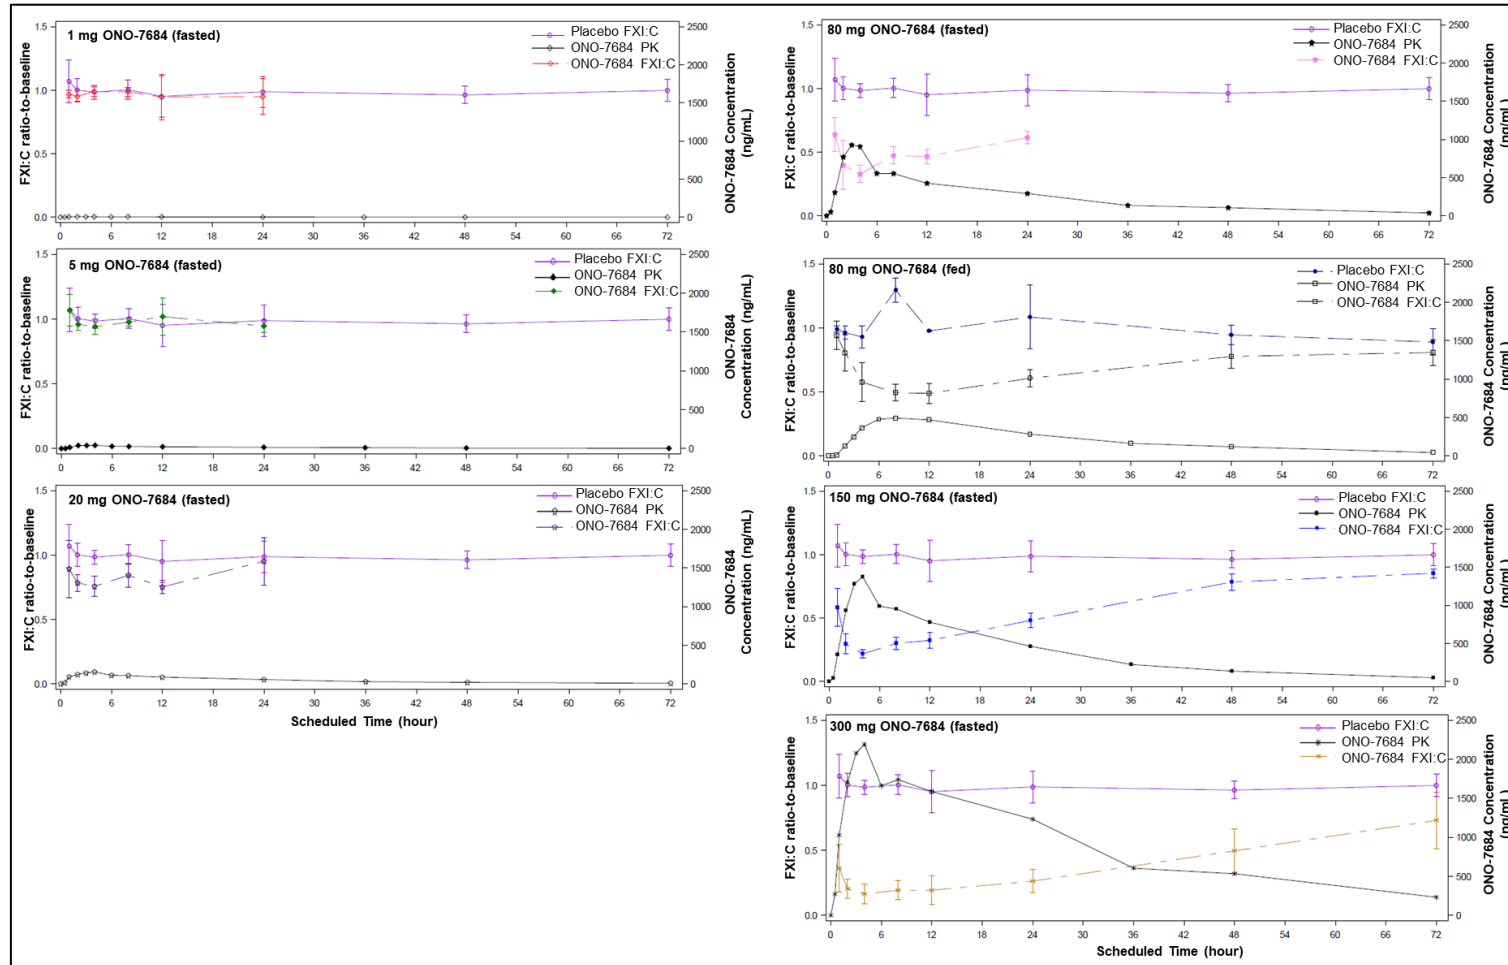

Supplement: BCP-87-3177-s008.pdf [file BCP-87-3177-s008.pdf]

# Suppl F3

A)

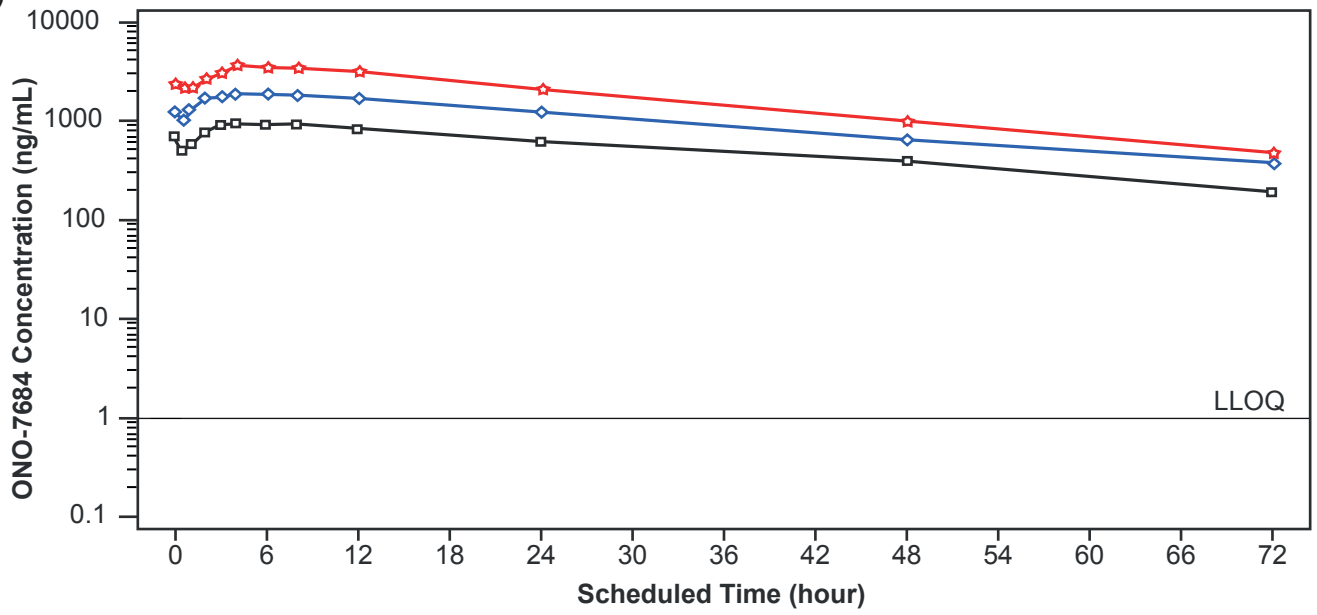

B)

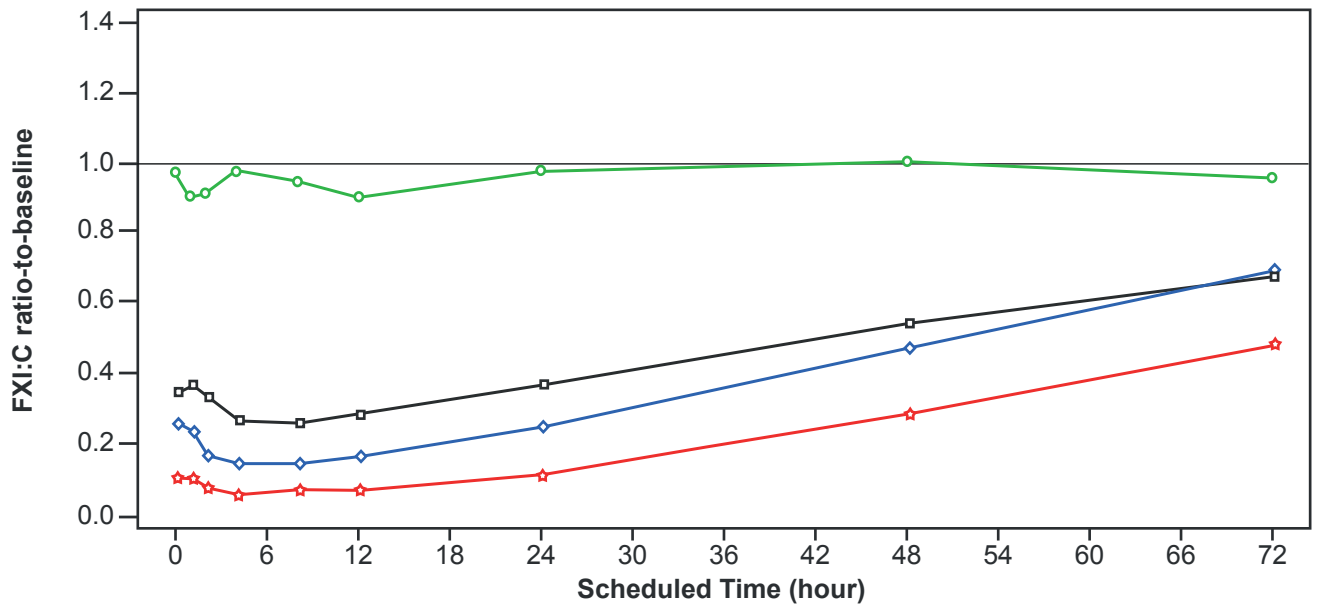

C)

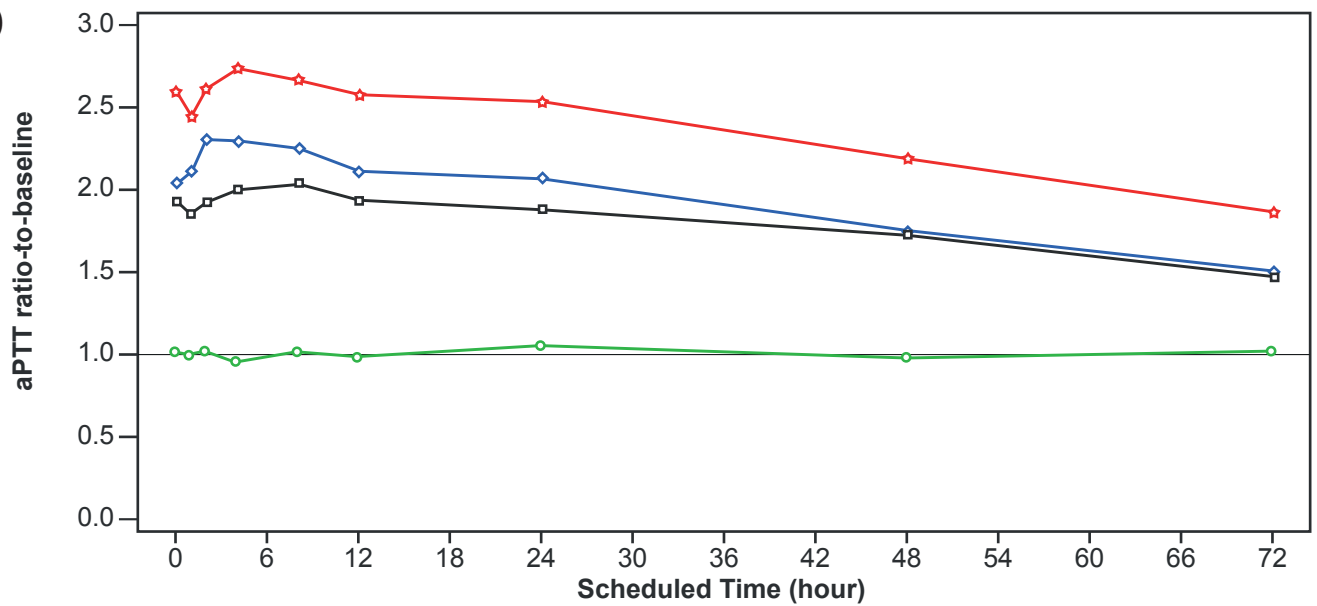

○ Placebo                      □ 80 mg ONO-7684 QD  
◇ 150 mg ONO-7684 QD      ☆ 250 mg ONO-7684 QD

LLOQ, Lower Limit Of Quantification

Supplement: BCP-87-3177-s009.pdf [file BCP-87-3177-s009.pdf]
